# Supplementary material
Source: PubMed Central journal article supplement (PMC2876583)
Supplement: supp_84_11_5670__1.pdf [file supp_84_11_5670__1.pdf]

Supplementary Fig. 1 Mordstein et al.

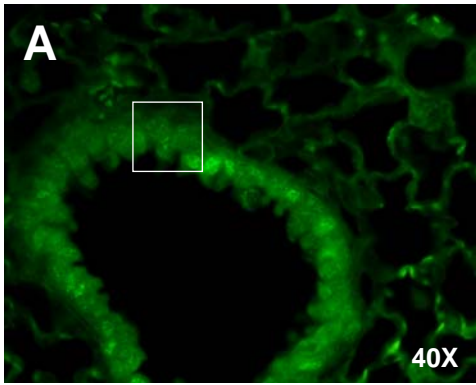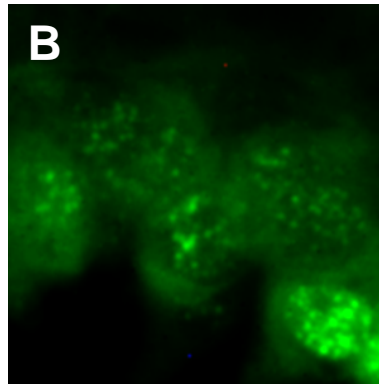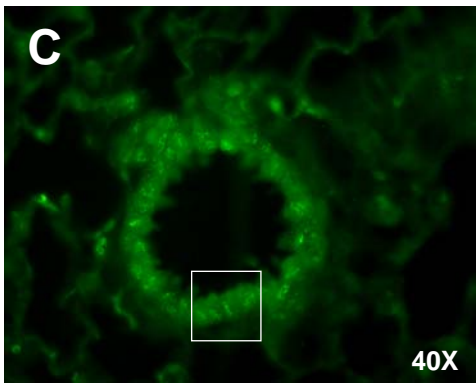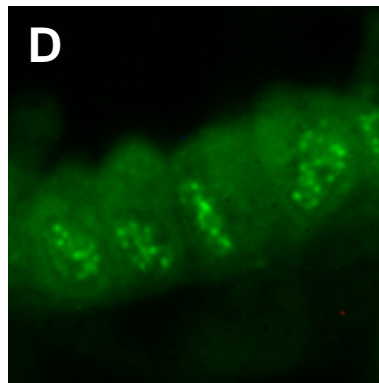

*IFNAR1*<sup>0/0</sup> + IFN- $\lambda$

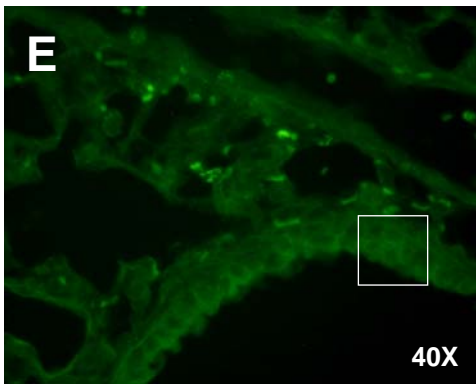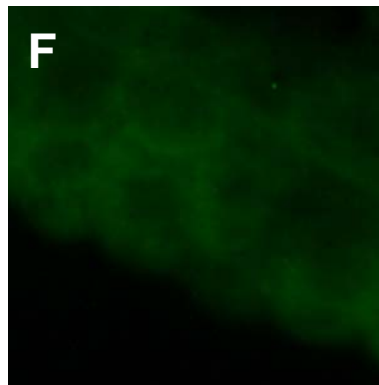

*IL28R $\alpha$* <sup>0/0</sup> + IFN- $\lambda$

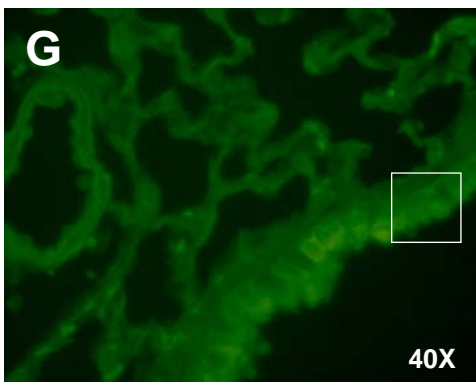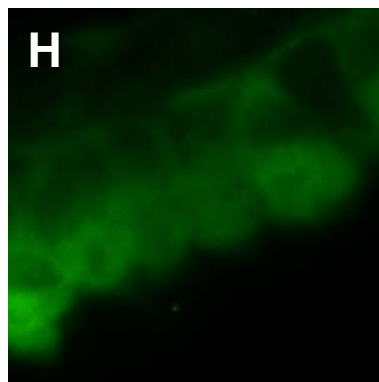

# Supplementary Fig. 2 Mordstein et al.

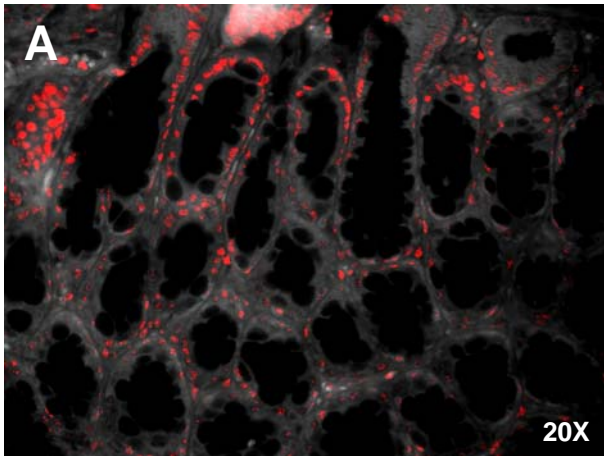

*IFNAR1<sup>0/0</sup>*  
RVFV cl.13

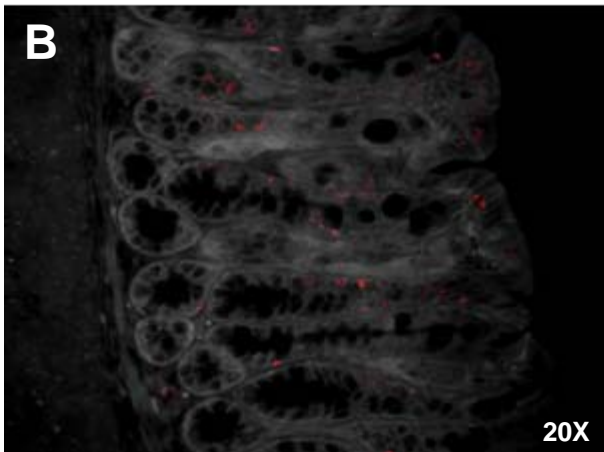

*IFNAR1<sup>0/0</sup>*  
mock
